# Supplementary material for: A common transcriptomic program acquired in the thymus defines tissue residency of MAIT and NKT subsets
Source: PubMed Central journal article supplement — J Exp Med. 2019 Jan 7;216(1):133–51. doi: 10.1084/jem.20181483 (PMC6314520; doi:10.1084/jem.20181483), 2019-01-07
Supplement: JEM_20181483_sm.pdf [file JEM_20181483_sm.pdf]

Supplemental material

Salou et al., <https://doi.org/10.1084/jem.20181483>

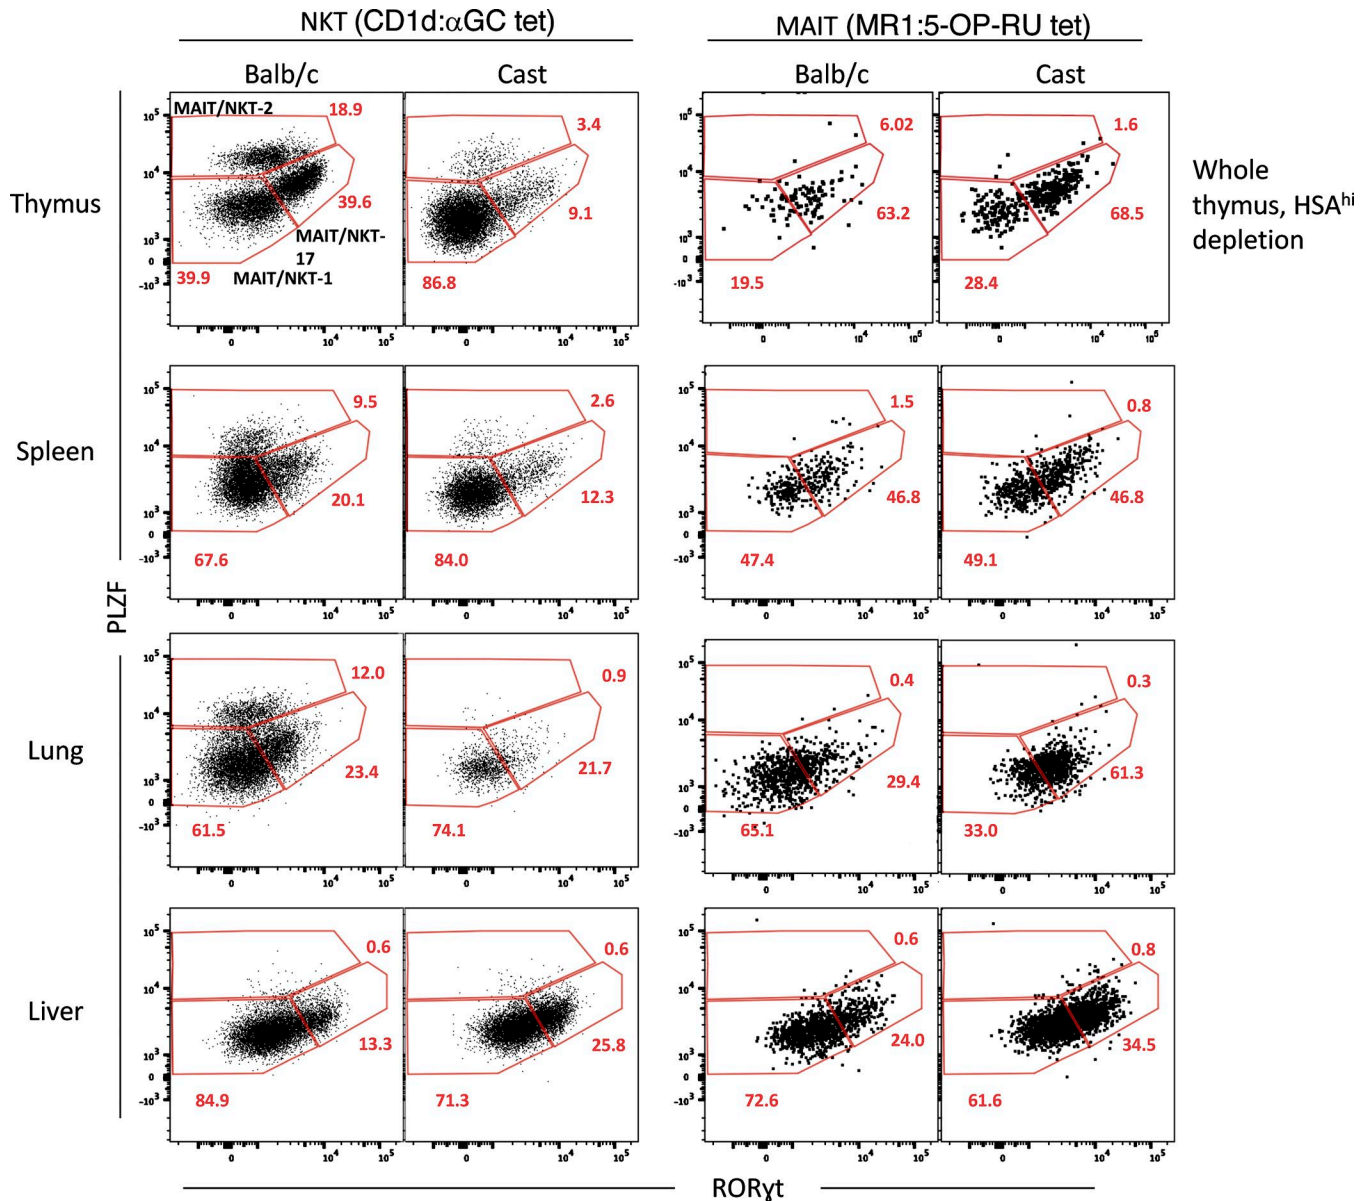

Figure S1. **Absence of MAIT2 subset.** CD44<sup>hi</sup> tetramer-positive T cells were studied in the indicated organs of the indicated mice (Balb/c or B6-MAIT<sup>ast</sup>) by staining with the indicated antibodies. The proportion of MAIT1/NKT1 (PLZF<sup>lo</sup>RORyt<sup>lo</sup>), MAIT2/NKT2 (PLZF<sup>hi</sup>RORyt<sup>lo</sup>), and MAIT17/NKT17 (PLZF<sup>int</sup>RORyt<sup>hi</sup>) was determined. The Balb/c strain was used as positive control for the presence of NKT2 subsets.

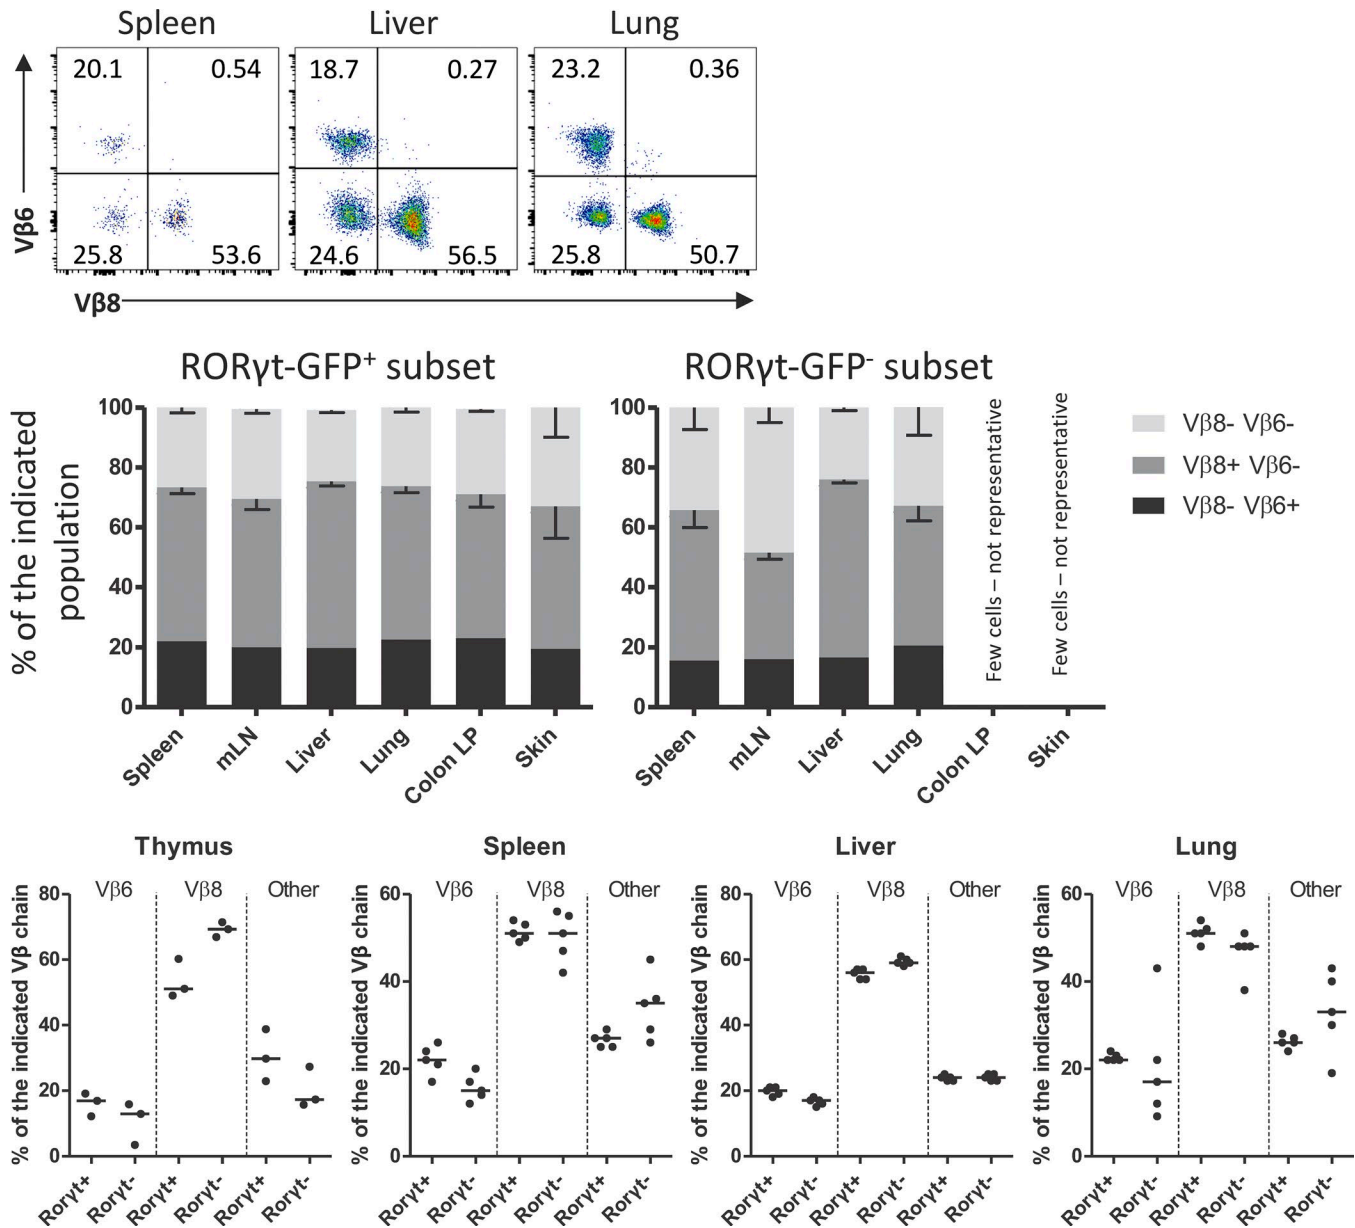

Figure S2. **Vβ6 and Vβ8 expression is similar in MAIT1 and MAIT17 cells.** T cells from the indicated organs were labeled with anti-Vβ6 and anti-Vβ8 antibodies as shown in the top panels. Only the CD44<sup>hi</sup>MR1tet<sup>+</sup> cells were analyzed.

Tables S1–S3 are included as separate Microsoft Excel files. Table S1 displays gene expression profile of murine cell subsets evaluated by microarray. Table S2 displays gene expression profile of human cell subsets evaluated by RNAseq. Table S3 displays expression levels (log<sub>2</sub> normalized) of genes associated to the Runx3-related tissue residency signature and to the circulating signature in the thymus and the peripheral organs.
